# Supplementary material
Source: Springer Nature journal article supplement (https://www.springermedizin.de/resource/supplementary/12888_2006_157_MOESM3_ESM.pdf/9482012)

Item: Descriptor for Item 7 [I0007] - 2 Levels for Person Factor: BABYAGE

Slope  
0.56

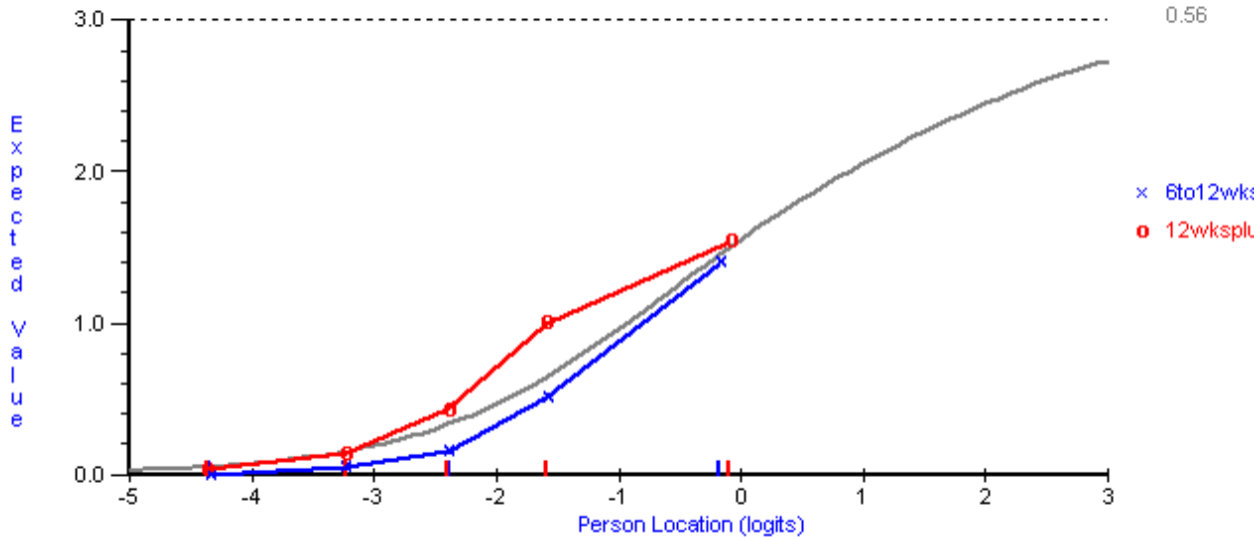

Supplement: MOESM3 [file 9482012]
